# Supplementary figures and images for: Extracellular vesicles derived from two ovarian cancer cell lines discriminated by biochemical and Fourier transform infrared spectroscopy approaches
Source: Royal Society of Chemistry journal article supplement (doi:10.1039/d5an00024f), 2025-01-01

**Fig. S1** Mean spectra with standard deviation of (a) SKOV3-derived EVs and  
(b) ES2-derived EVs

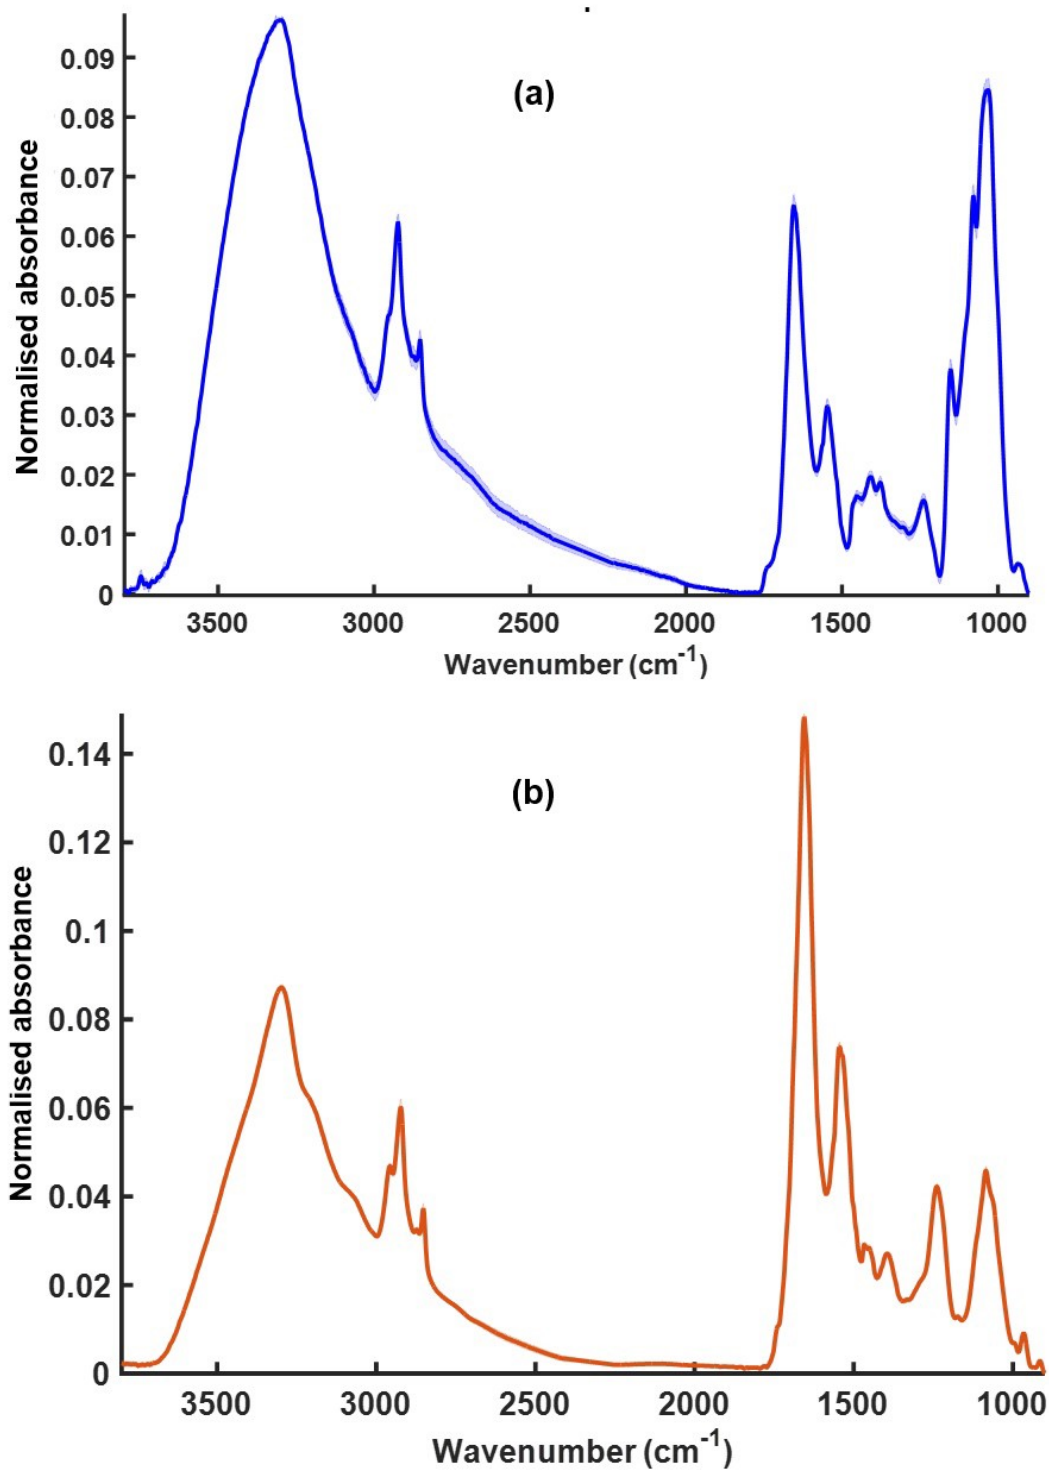

Supplement: d5an00024f1.pdf [file d5an00024f1.pdf]

**Fig. S2** Mean spectra with standard deviation of (a) SKOV3 cells and (b) ES2 cells

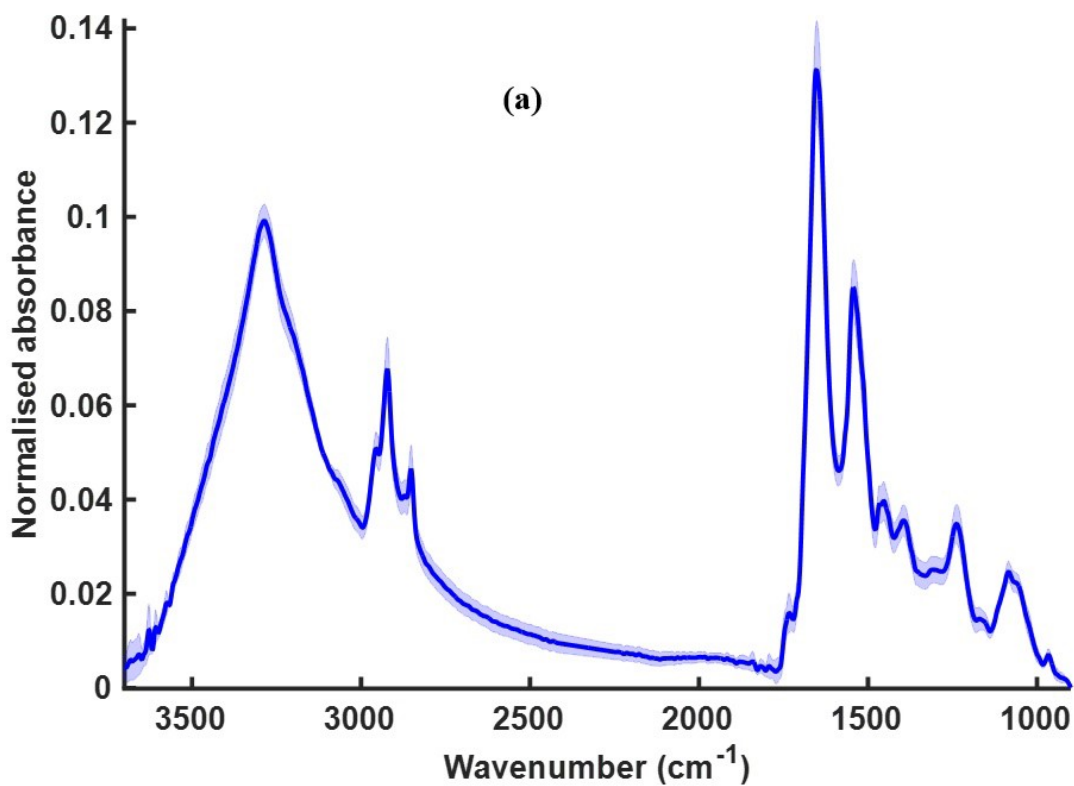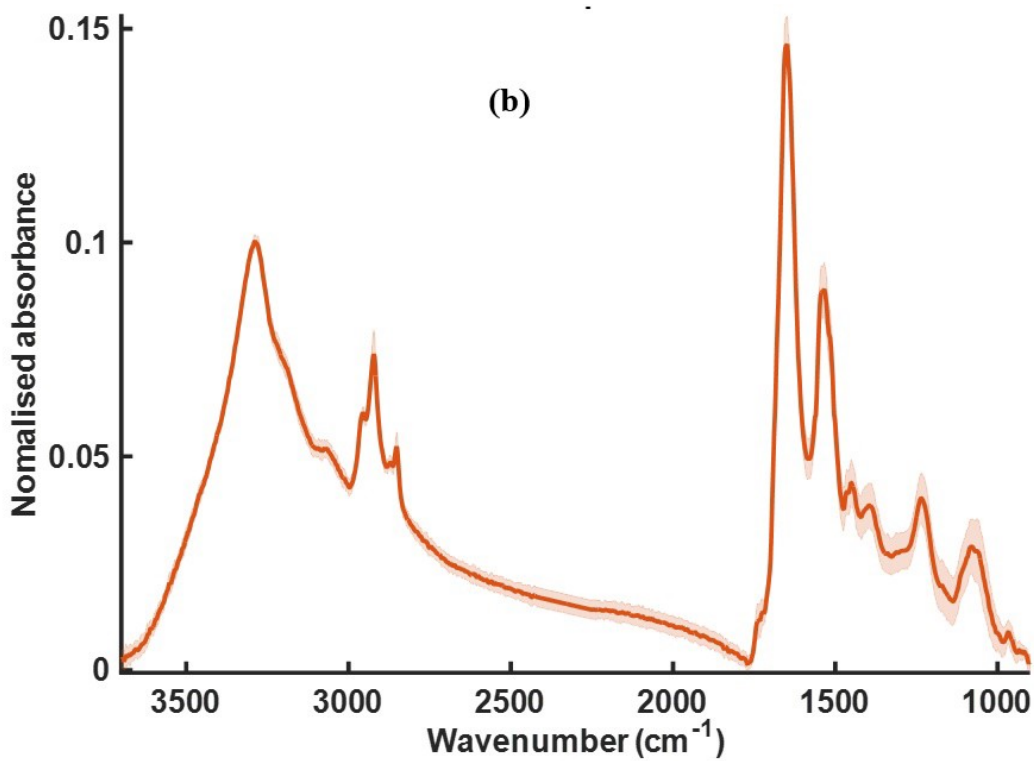

Supplement: d5an00024f2.pdf [file d5an00024f2.pdf]
